# Supplementary material
Source: PubMed Central journal article supplement (PMC4378109)
Supplement: ASN.2014040324_ASN2014040324SupplementaryData.pdf [file ASN.2014040324_ASN2014040324SupplementaryData.pdf]

## Supplement

| <b>Beta blocker</b> | <b>Molecular Weight (Daltons)</b> | <b>Protein binding (%)</b> | <b>Volume of Distribution (L/kg)</b> | <b>Elimination <math>t_{1/2}</math> with normal GFR (hours)</b> | <b>Elimination <math>t_{1/2}</math> in stage V CKD (hours)</b> | <b>Elimination <math>t_{1/2}</math> during hemodialysis (hours)</b> | <b>Clearance during hemodialysis (mL/min)</b> | <b>Plasma reduction during hemodialysis (%)</b> | <b>Recommendation for use in hemodialysis</b>                                                                       |
|---------------------|-----------------------------------|----------------------------|--------------------------------------|-----------------------------------------------------------------|----------------------------------------------------------------|---------------------------------------------------------------------|-----------------------------------------------|-------------------------------------------------|---------------------------------------------------------------------------------------------------------------------|
| <b>Bisoprolol</b>   | 325                               | 30                         | 3.0                                  | 10 - 12.1 <sup>1,2</sup>                                        | 23.7 - 37.2 <sup>2</sup>                                       | --                                                                  | 50.8 – 69.6 <sup>3</sup>                      | 25.4 – 34.8 <sup>3</sup>                        | Limit the total dose given to patients receiving chronic hemodialysis. <sup>2,3</sup>                               |
| <b>Propranolol</b>  | 259                               | 90                         | 4.9                                  | 4.3 <sup>4</sup>                                                | 2.2 – 3.5 <sup>4,5</sup>                                       | 4 – 5 <sup>4</sup>                                                  | --                                            | --                                              | Alternation of the dose is not needed in patients receiving hemodialysis. <sup>4</sup>                              |
| <b>Acebutolol</b>   | 336                               | 26                         | 1.2                                  | 3.5 – 8.8 <sup>6</sup>                                          | 7.0 – 7.5 <sup>6</sup>                                         | 3.2 <sup>6</sup>                                                    | 42.6 <sup>6</sup>                             | --                                              | The dose and timing of administration should be adjusted in patients receiving chronic hemodialysis. <sup>6</sup>   |
| <b>Atenolol</b>     | 266                               | 10                         | 4.2                                  | 5.9 – 6.3 <sup>7,8</sup>                                        | 73.4 <sup>9</sup>                                              | 4.3 – 7.5 <sup>5,8-10</sup>                                         | 42.6 <sup>9</sup>                             | 34 <sup>10</sup>                                | It is necessary to adjust the dose and frequency of dosing in patients receiving chronic hemodialysis. <sup>9</sup> |
| <b>Metoprolol</b>   | 267                               | 10                         | 3.2                                  | 3.5                                                             | 4.2 – 5.8 <sup>5,11</sup>                                      | 5.0 <sup>11</sup>                                                   | --                                            | --                                              | --                                                                                                                  |

**Table S2. Limitations of the available pharmacokinetic studies of beta blockers in hemodialysis.**

| <b>Beta blocker</b> | <b>References</b>                      | <b>Limitations</b>                                                                                                                                                                                                                                                                                                                               |
|---------------------|----------------------------------------|--------------------------------------------------------------------------------------------------------------------------------------------------------------------------------------------------------------------------------------------------------------------------------------------------------------------------------------------------|
| <b>Bisoprolol</b>   | Payton, <i>et al</i> <sup>2</sup>      | Published in 1987. Dialysis prescription not described. Half-life and clearance rates not determined.                                                                                                                                                                                                                                            |
|                     | Kanegae, <i>et al</i> <sup>3</sup>     | Clearance estimated by the A-V difference method only. Variances about the mean clearance rates not reported.                                                                                                                                                                                                                                    |
| <b>Propranolol</b>  | Wood, <i>et al</i> <sup>4</sup>        | Published in 1980. Dialysis prescription not described. Half-life estimated but not clearance rates.                                                                                                                                                                                                                                             |
|                     | Niedermayer, <i>et al</i> <sup>5</sup> | Published in 1978. Half-life estimated with tritiated drug. Dialysis prescription not described.                                                                                                                                                                                                                                                 |
| <b>Acebutolol</b>   | Roux, <i>et al</i> <sup>6</sup>        | Published in 1980. Dialysis prescription was 2 – 3 times per week for 5 – 7 hour treatments with a bed-side canister machine using a cuprophane membrane. The average Qb was 238 ml/min. Ultrafiltration rate was 2 ml/min. Clearance estimated by the A-V difference method only. Wide ranges of dialysis clearance rates (21.6 – 65.4 ml/min). |
| <b>Atenolol</b>     | Campese, <i>et al</i> <sup>10</sup>    | Published in 1985. Dialysis prescription was for 5 hours with cellulose dialyzers, but no other details provided. Half-life estimated but not clearance rates.                                                                                                                                                                                   |
|                     | Flouvat, <i>et al</i> <sup>9</sup>     | Published in 1980. Clearance estimated by the A-V difference method only. Wide ranges of dialysis clearance rates reported (17.4 – 92.7 ml/min). Dialysis prescription was for 5 – 7 hours, mean Qb of 236 ml/min with a coil kidney using a cuprophane dialyzer. Ultrafiltration rate was 2 ml/min.                                             |
|                     | Kirch, <i>et al</i> <sup>8</sup>       | Published in 1981. Half-life estimated but not clearance rates. Two of five hemodialysis patients had undetectable drug levels. Dialysis prescription not described.                                                                                                                                                                             |
|                     | Niedermayer, <i>et al</i> <sup>5</sup> | Published in 1978. Half-life estimated with tritiated drug. Dialysis prescription not described.                                                                                                                                                                                                                                                 |
| <b>Metoprolol</b>   | Seiler, <i>et al</i> <sup>11</sup>     | Published in 1980. Dialysis prescription not described. Dialysis started 20 hours following drug ingestion – only the dialysis half-life of drug metabolites could be assessed.                                                                                                                                                                  |
|                     | Niedermayer, <i>et al</i> <sup>5</sup> | Published in 1978. Half-life estimated with tritiated drug. Dialysis prescription not described.                                                                                                                                                                                                                                                 |

| Table S3. Baseline characteristics of the Non-Dialysis Cohort                                   |                                                                                 |                                                                       |                                 |                                                                                 |                                                                       |                                 |
|-------------------------------------------------------------------------------------------------|---------------------------------------------------------------------------------|-----------------------------------------------------------------------|---------------------------------|---------------------------------------------------------------------------------|-----------------------------------------------------------------------|---------------------------------|
| Baseline Characteristics                                                                        | Unmatched Cohort                                                                |                                                                       |                                 | Propensity-matched Cohort                                                       |                                                                       |                                 |
|                                                                                                 | High <u>Dialyzability</u><br>(acebutolol, atenolol,<br>metoprolol) <sup>1</sup> | Low <u>Dialyzability</u><br>(propranolol,<br>bisoprolol) <sup>1</sup> | Standardized<br>Differences (%) | High <u>Dialyzability</u><br>(acebutolol, atenolol,<br>metoprolol) <sup>1</sup> | Low <u>Dialyzability</u><br>(propranolol,<br>bisoprolol) <sup>1</sup> | Standardized<br>Differences (%) |
|                                                                                                 | N = 36,081                                                                      | N = 13,607                                                            |                                 | N = 13,586                                                                      | N = 13,586                                                            |                                 |
| Age, mean (SD)                                                                                  | 74.4 (6.4)                                                                      | 74.4 (6.3)                                                            | 0                               | 74.5 (6.4)                                                                      | 74.4 (6.3)                                                            | 1                               |
| Sex, female (%)                                                                                 | 19,174 (53.1)                                                                   | 6,995 (51.4)                                                          | 3                               | 6,988 (51.4)                                                                    | 6,988 (51.4)                                                          | 0                               |
| Residence, rural (%)                                                                            | 3468 (9.6)                                                                      | 1,108 (8.1)                                                           | 5                               | 1,299 (9.6)                                                                     | 1,106 (8.1)                                                           | 5                               |
| <b>General measures of comorbidity (measured in the year before the index date<sup>2</sup>)</b> |                                                                                 |                                                                       |                                 |                                                                                 |                                                                       |                                 |
| Distinct prescription drugs, median (IQR)                                                       | 10 (6 – 15)                                                                     | 11 (7 – 15)                                                           | 1                               | 11 (7 – 15)                                                                     | 11 (7 – 15)                                                           | 1                               |
| <b>Comorbidities (measured in the 5 years before the index date<sup>2</sup>), n (%)</b>         |                                                                                 |                                                                       |                                 |                                                                                 |                                                                       |                                 |
| Coronary artery disease <sup>3</sup>                                                            | 18,612 (51.6)                                                                   | 7,100 (52.2)                                                          | 1                               | 7,052 (51.9)                                                                    | 7,095 (52.2)                                                          | 1                               |
| Coronary revascularization                                                                      | 4,648 (12.9)                                                                    | 1,574 (11.6)                                                          | 4                               | 1,594 (11.7)                                                                    | 1,573 (11.6)                                                          | 0                               |
| Heart failure                                                                                   | 5,111 (14.2)                                                                    | 2,198 (16.2)                                                          | 6                               | 2,174 (16.0)                                                                    | 2,190 (12.1)                                                          | 0                               |
| Arrhythmia <sup>4</sup>                                                                         | 3,956 (11.0)                                                                    | 1,567 (11.5)                                                          | 2                               | 1,627 (12.0)                                                                    | 1,559 (11.5)                                                          | 2                               |
| Aortic aneurysm repair or bypass                                                                | 191 (0.5)                                                                       | 56 (0.4)                                                              | 2                               | 61 (0.5)                                                                        | 56 (0.4)                                                              | 1                               |
| Peripheral vascular disease                                                                     | 623 (1.7)                                                                       | 218 (1.6)                                                             | 1                               | 226 (1.7)                                                                       | 218 (1.6)                                                             | 0                               |
| Stroke or TIA                                                                                   | 975 (2.7)                                                                       | 321 (2.4)                                                             | 2                               | 313 (2.3)                                                                       | 321 (2.4)                                                             | 0                               |
| Diabetes mellitus                                                                               | 8,389 (23.3)                                                                    | 3,157 (23.2)                                                          | 0                               | 3,181 (23.4)                                                                    | 3,154 (23.2)                                                          | 0                               |
| <b>Estimated glomerular filtration rate category, no. (%)</b>                                   |                                                                                 |                                                                       |                                 |                                                                                 |                                                                       |                                 |
| 45 – 59 ml/min/1.73m <sup>2</sup>                                                               | 8702 (24.1)                                                                     | 3208 (23.6)                                                           | 1                               | 3317 (24.4)                                                                     | 3200 (23.6)                                                           | 2                               |
| 60 – 89 ml/min/1.73m <sup>2</sup>                                                               | 23704 (65.7)                                                                    | 9057 (66.6)                                                           | 2                               | 8928 (65.7)                                                                     | 9047 (66.6)                                                           | 2                               |
| ≥ 90 ml/min/1.73m <sup>2</sup>                                                                  | 3675 (10.2)                                                                     | 1342 (9.9)                                                            | 1                               | 1341 (9.9)                                                                      | 1339 (9.9)                                                            | 0                               |
| <b>Beta blocker dose<sup>5</sup> (measured at the index date<sup>2</sup>)</b>                   |                                                                                 |                                                                       |                                 |                                                                                 |                                                                       |                                 |
| Low dose, n (%)                                                                                 | 32,377 (89.7)                                                                   | 12,780 (93.9)                                                         | 15*                             | 12,763 (93.9)                                                                   | 12,763 (93.9)                                                         | 0                               |
| <b>Medications (measured in the 180 days before the index date<sup>2</sup>), n (%)</b>          |                                                                                 |                                                                       |                                 |                                                                                 |                                                                       |                                 |
| Alpha blockers                                                                                  | 1,424 (4.0)                                                                     | 518 (3.8)                                                             | 13*                             | 222 (6.7)                                                                       | 202 (6.1)                                                             | 2                               |
| ACE inhibitors                                                                                  | 15,571 (46.2)                                                                   | 5,945 (43.7)                                                          | 1                               | 6,010 (44.2)                                                                    | 5,936 (43.7)                                                          | 1                               |
| ARB                                                                                             | 7,645 (21.2)                                                                    | 3,384 (24.9)                                                          | 9                               | 3,259 (24.0)                                                                    | 3,374 (24.8)                                                          | 2                               |
| CCB                                                                                             | 12,291 (34.1)                                                                   | 4,773 (35.1)                                                          | 2                               | 4,736 (34.9)                                                                    | 4,764 (35.1)                                                          | 0                               |
| Digoxin                                                                                         | 1,687 (4.7)                                                                     | 801 (5.9)                                                             | 5                               | 679 (5.0)                                                                       | 799 (5.9)                                                             | 4                               |
| Statins                                                                                         | 18,575 (51.5)                                                                   | 7,519 (55.3)                                                          | 8                               | 7,490 (55.1)                                                                    | 7,502 (55.2)                                                          | 0                               |
| Warfarin                                                                                        | 4,278 (11.9)                                                                    | 1,986 (14.6)                                                          | 8                               | 1,850 (13.6)                                                                    | 1,977 (14.6)                                                          | 3                               |
| Beta blockers                                                                                   |                                                                                 |                                                                       |                                 |                                                                                 |                                                                       |                                 |
| Acebutolol                                                                                      | 1,361 (3.8)                                                                     | -                                                                     | -                               | 460 (3.4)                                                                       | -                                                                     | -                               |
| Atenolol                                                                                        | 15,852 (43.9)                                                                   | -                                                                     | -                               | 5488 (40.4)                                                                     | -                                                                     | -                               |
| Metoprolol                                                                                      | 18,868 (52.3)                                                                   | -                                                                     | -                               | 7638 (56.2)                                                                     | -                                                                     | -                               |
| Bisoprolol                                                                                      | -                                                                               | 11,318 (83.2)                                                         | -                               | -                                                                               | 11298 (83.2)                                                          | -                               |
| Propranolol                                                                                     | -                                                                               | 2,289 (16.8)                                                          | -                               | -                                                                               | 2288 (18.8)                                                           | -                               |
| <b>Propensity Score Probability (propensity of receiving a high dialyzability beta blocker)</b> |                                                                                 |                                                                       |                                 |                                                                                 |                                                                       |                                 |
| Mean (SD)                                                                                       | 0.74 (0.09)                                                                     | 0.69 (0.09)                                                           | 48*                             | 0.70 (0.09)                                                                     | 0.70 (0.09)                                                           | 3                               |
| Median (IQR)                                                                                    | 0.75 (0.68 – 0.80)                                                              | 0.70 (0.63 – 0.77)                                                    | 48*                             | 0.70 (0.63 – 0.77)                                                              | 0.70 (0.63 – 0.77)                                                    | 3                               |

1. "Acebutolol" refers to acebutolol HCl, "metoprolol" refers to metoprolol tartrate, "bisoprolol" refers to bisoprolol fumarate  
2. "Index date" is defined as the day of the first new study beta blocker prescription filled during hemodialysis.  
3. Coronary artery disease includes myocardial infarction, angina, and percutaneous coronary interventions  
4. Arrhythmia includes brady and tachyarrhythmias.  
5. Definitions of "high" or "low" dose were based on the recommendations found in each product's monograph. High doses: acebutolol, ≥ 400 mg per day; atenolol, > 50 mg per day; metoprolol, > 100 mg per day, propranolol, ≥ 160 mg per day; bisoprolol, > 5 mg per day. calcium channel blocker.  
\* Denotes significant standardized differences (≥ 10%)

| <b>Table S4. Secondary outcomes (hemodialysis cohort, n = 3,294)</b> |                          |                              |                |
|----------------------------------------------------------------------|--------------------------|------------------------------|----------------|
|                                                                      | <b>No. of events (%)</b> | <b>Relative Risk (95%CI)</b> | <b>P value</b> |
| <b>Composite of death, myocardial infarction, or heart failure</b>   |                          |                              |                |
| High Dialyzability Beta Blockers                                     | 269 (8.2)                | 1.2 (1.0 – 1.5)              | 0.03           |
| Low Dialyzability Beta Blockers                                      | 225 (6.8)                | 1 (referent)                 |                |
| <b>Myocardial infarction</b>                                         |                          |                              |                |
| High Dialyzability Beta Blockers                                     | 40 (1.2)                 | 1.1 (0.7 – 1.7)              | 0.82           |
| Low Dialyzability Beta Blockers                                      | 38 (1.2)                 | 1 (referent)                 |                |
| <b>Heart failure</b>                                                 |                          |                              |                |
| High Dialyzability Beta Blockers                                     | 66 (2.0)                 | 0.9 (0.7 – 1.3)              | 0.66           |
| Low Dialyzability Beta Blockers                                      | 71 (2.2)                 | 1 (referent)                 |                |

| <b>Table S5. All cause mortality (Conditional Cox Proportional Hazards Model)</b> |                        |                     |                          |                                           |                             |                |
|-----------------------------------------------------------------------------------|------------------------|---------------------|--------------------------|-------------------------------------------|-----------------------------|----------------|
|                                                                                   | <b>No. of patients</b> | <b>Person-years</b> | <b>No. of events (%)</b> | <b>Event Rate (per 100 patient-years)</b> | <b>Hazard Ratio (95%CI)</b> | <b>P value</b> |
| <b>Hemodialysis cohort</b>                                                        |                        |                     |                          |                                           |                             |                |
| High Dialyzability Beta Blockers                                                  | 3294                   | 1578.9              | 182                      | 11.5                                      | 1.3 (1.1 – 1.7)             | 0.02           |
| Low Dialyzability Beta Blockers                                                   | 3294                   | 1587.3              | 135                      | 8.5                                       | 1 (referent)                |                |
| <b>Non-dialysis cohort</b>                                                        |                        |                     |                          |                                           |                             |                |
| High Dialyzability Beta Blockers                                                  | 13,586                 | 6648.6              | 186                      | 2.7                                       | 1.0 (0.8 – 1.3)             | 0.71           |
| Low Dialyzability Beta Blockers                                                   | 13,586                 | 6650.3              | 179                      | 2.8                                       | 1 (referent)                |                |

## Supplement References

1. Kirch W, Rose I, Demers HG, Leopold G, Pabst J, Ohnhaus EE: Pharmacokinetics of bisoprolol during repeated oral administration to healthy volunteers and patients with kidney or liver disease. *Clin Pharmacokinet* 13: 110–117, 1987
2. Payton CD, Fox JG, Pauleau NF, Boulton-Jones JM, Ioannides C, Johnston A: The single dose pharmacokinetics of bisoprolol (10 mg) in renal insufficiency: the clinical significance of balanced clearance. *European Heart Journal* 8: 12–22, 1987
3. Kanegae K, Hiroshige K, Suda T, Iwamoto M, Ohta T, Nakashima Y, Ohtani A: Pharmacokinetics of bisoprolol and its effect on dialysis refractory hypertension. *Int J Artif Organs* 22: 798–804, 1999
4. Wood A, Vestal RE, Spannuth CL, Stone WJ, Wilkinson GR, Shand DG: Propranolol disposition in renal failure. *Br. J. Clin. Pharm.* 10: 561–566, 1980
5. Niedermayer W, Seiler KU, Wassermann O: Pharmacokinetics of antihypertensive drugs (atenolol, metoprolol, propranolol and clonidine) and their metabolites during intermittent haemodialysis in humans. *Proc Eur Dial Transplant Assoc* 15: 607–609, 1978
6. Roux A, Aubert P, Guedon J, Flouvat B: Pharmacokinetics of Acebutolol in Patients with all Grades of Renal Failure. *Eur J Clin Pharmacol* 17: 339–348, 1980
7. Brown HC, Carruthers SG, Johnston GD, Kelly JG, McAinsh J, McDevitt DG, Shanks RG: Clinical pharmacologic observations on atenolol, a beta-adrenoceptor blocker. *Clin. Pharmacol. Ther.* 20: 524–534, 1976
8. Kirch W, Kohler H, Mutschler E, Schafer M: Pharmacokinetics of atenolol in relation to renal function. *Eur J Clin Pharmacol* 19: 65–71, 1981
9. Flouvat B, Decourt S, Aubert P, Potaux L, Domart M, Goupil A: Pharmacokinetics of atenolol in patients with terminal renal failure and influence of haemodialysis. *Br. J. Clin. Pharm.* 9: 379–385, 1980
10. Campese VM, Feinstein EI, Gura V, Mason WD: Pharmacokinetics of Atenolol in Patients Treated With Chronic Hemodialysis or Peritoneal Dialysis. *J. Clin. Pharmacol.* 25: 393–395, 1985
11. Seiler KU, Schuster KJ, Meyer GJ, Niedermayer W, Wassermann O: The pharmacokinetics of metoprolol and its metabolites in dialysis patients. *Clin Pharmacokinet* 5: 192–198, 1980
